# Supplementary material
Source: ML conference proceedings conference paper supplement (https://proceedings.neurips.cc/paper_files/paper/2014/hash/50905d7b2216bfeccb5b41016357176b-Abstract.html)
Supplement: Supplementary file [file 50905d7b2216bfeccb5b41016357176b-Supplemental.zip]

---

# Difference of Convex Functions Programming for Reinforcement Learning (Supplementary File)

---

**Bilal Piot<sup>1,2</sup>, Matthieu Geist<sup>1</sup>, Olivier Pietquin<sup>2,3</sup>**

<sup>1</sup>MaLIS research group (SUPELEC) - UMI 2958 (GeorgiaTech-CNRS), France

<sup>2</sup>LIFL (UMR 8022 CNRS/Lille 1) - SequeL team, Lille, France

<sup>3</sup>University Lille 1 - IUF (Institut Universitaire de France), France

bilal.piot@lifl.fr, matthieu.geist@supelec.fr, olivier.pietquin@univ-lille1.fr

This supplementary material provides the proofs of the results given in the main paper.

## 1 Proof of Th. 1

**Theorem 1.** *Let  $\nu \in \Delta_{S \times A}$ ,  $\mu \in \Delta_{S \times A}$ ,  $\hat{\pi} \in A^S$  and  $C_1(\nu, \mu, \hat{\pi}) \in [1, +\infty[\cup\{+\infty\}$  the smallest constant verifying  $(1 - \gamma)\nu \sum_{t \geq 0} \gamma^t P_{\hat{\pi}}^t \leq C_1(\nu, \mu, \hat{\pi})\mu$ , then:*

$$\forall Q \in \mathbb{R}^{S \times A}, \|Q^* - Q^\pi\|_{p, \nu} \leq \frac{2}{1 - \gamma} \left( \frac{C_1(\nu, \mu, \pi) + C_1(\nu, \mu, \pi^*)}{2} \right)^{\frac{1}{p}} \|T^*Q - Q\|_{p, \mu}, \quad (1)$$

where  $\pi$  is greedy with respect to  $Q$  and  $\pi^*$  any optimal policy.

*Proof.* This proof is widely inspired by the proof of a similar result for value functions (Th. 5.3 in [1]). First, we show that, componentwise:

$$\forall Q \in \mathbb{R}^{S \times A}, Q^* - Q^\pi \leq [(I - \gamma P_{\pi^*})^{-1} + (I - \gamma P_\pi)^{-1}] |T^*Q - Q|. \quad (2)$$

To do so, we use principally the fact that  $T^*Q \geq T^{\pi^*}Q$  and  $T^\pi Q = T^*Q$  as  $\pi$  is greedy with respect to  $Q$ . Thus:

$$\begin{aligned} Q^* - Q^\pi &\stackrel{(a)}{=} T^{\pi^*}Q^* - T^*Q + T^*Q - T^\pi Q^\pi, \\ &\stackrel{(b)}{\leq} T^{\pi^*}Q^* - T^{\pi^*}Q + T^\pi Q - T^\pi Q^\pi, \\ &= \gamma P_{\pi^*}(Q^* - Q) + \gamma P_\pi(Q - Q^\pi), \\ &= \gamma P_{\pi^*}(Q^* - Q^\pi + Q^\pi - Q) + \gamma P_\pi(Q - Q^\pi), \end{aligned}$$

where equality (a) comes from the fact that  $Q^* = T^{\pi^*}Q^*$  and  $Q^\pi = T^\pi Q^\pi$  and inequality (b) from the fact that  $T^*Q \geq T^{\pi^*}Q$  and  $T^\pi Q = T^*Q$ . Hence  $(I - \gamma P_{\pi^*})(Q^* - Q^\pi) \leq \gamma(P_{\pi^*} - P_\pi)(Q^\pi - Q)$ . In addition as  $(I - \gamma P_{\pi^*})^{-1} = \sum_{t \geq 0} \gamma^t P_{\pi^*}^t$  is a matrix with only positive elements, we can multiply by  $(I - \gamma P_{\pi^*})^{-1}$  on each side of the matricial inequality and conserve the order:

$$(Q^* - Q^\pi) \leq \gamma(I - \gamma P_{\pi^*})^{-1}(P_{\pi^*} - P_\pi)(Q^\pi - Q).$$

Moreover, we have:

$$\begin{aligned} (I - \gamma P_\pi)(Q^\pi - Q) &= \gamma P_\pi(Q - Q^\pi) + Q^\pi - Q, \\ &= T^\pi Q - T^\pi Q^\pi + Q^\pi - Q \stackrel{(c)}{=} T^*Q - Q, \end{aligned}$$

where equality (c) comes from the fact that  $Q^\pi = T^\pi Q^\pi$  and  $T^\pi Q = T^*Q$ . Therefore, we have:

$$\begin{aligned}
(Q^* - Q^\pi) &\leq \gamma(I - \gamma P_{\pi^*})^{-1}(P_{\pi^*} - P_\pi)(Q^\pi - Q), \\
&= (I - \gamma P_{\pi^*})^{-1}(\gamma P_{\pi^*} - \gamma P_\pi)(I - \gamma P_\pi)^{-1}(T^*Q - Q), \\
&= (I - \gamma P_{\pi^*})^{-1}((I - \gamma P_\pi) - (I - \gamma P_{\pi^*}))(I - \gamma P_\pi)^{-1}(T^*Q - Q), \\
&= [(I - \gamma P_{\pi^*})^{-1} - (I - \gamma P_\pi)^{-1}](T^*Q - Q), \\
&\leq [(I - \gamma P_{\pi^*})^{-1} + (I - \gamma P_\pi)^{-1}]\|T^*Q - Q\|.
\end{aligned}$$

Now, as it is mentioned in [1], in order to obtain an  $L_{p,\mu}$  bound, we remark that if  $u \in \mathbb{R}^{S \times A}$  and  $v \in \mathbb{R}^{S \times A}$  are two vectors with positive elements and  $N$  is stochastic matrix of size  $N_S N_A \times N_S N_A$  such that  $u \leq Nv$  and if  $\nu \in \Delta_{S \times A}$  and  $\mu \in \Delta_{S \times A}$  are two distributions such that  $\nu N \leq C\mu$  where  $C$  is a constant greater to 1, then :

$$\|u\|_{p,\nu} \leq C^{\frac{1}{p}} \|v\|_{p,\mu}. \quad (3)$$

Indeed:

$$\begin{aligned}
\|u\|_{p,\nu}^p &= \sum_{(s,a) \in S \times A} [u(s,a)]^p \nu(s,a) \stackrel{(d)}{\leq} \sum_{(s,a) \in S \times A} \left( \sum_{(s',a') \in S \times A} N((s,a), (s',a')) v(s',a') \right)^p \nu(s,a), \\
&\stackrel{(e)}{\leq} \sum_{(s,a) \in S \times A} \sum_{(s',a') \in S \times A} N((s,a), (s',a')) [v(s',a')]^p \nu(s,a), \\
&\stackrel{(f)}{\leq} C \sum_{(s',a') \in S \times A} \mu(s',a') [v(s',a')]^p = C \|v\|_{p,\mu}^p,
\end{aligned}$$

where inequality (d) is true because  $u \leq Nv$ , inequality (e) is true using Jensen's Inequality and inequality (f) comes from  $\nu N \leq C\mu$ .

To establish our bound (Eq. (1)), it is sufficient to remark that the inequality Eq. (2) can be written:

$$Q^* - Q^\pi \leq A \frac{2}{1-\gamma} |T^*Q - Q|,$$

where  $A = \frac{1-\gamma}{2} [(I - \gamma P_{\pi^*})^{-1} + (I - \gamma P_\pi)^{-1}]$  is a stochastic matrix. Moreover by definition of  $C_1(\nu, \mu, \pi)$  and  $C_1(\nu, \mu, \pi^*)$  we have:

$$\nu A \leq \left( \frac{C_1(\nu, \mu, \pi) + C_1(\nu, \mu, \pi^*)}{2} \right) \mu.$$

Thus, if we rewrite Eq. (3), where  $Q^* - Q^\pi$  plays the role of  $u$ ,  $\frac{2}{1-\gamma} |T^*Q - Q|$  plays the role of  $v$ ,  $A$  plays the role of  $N$ , and  $\frac{C_1(\nu, \mu, \pi) + C_1(\nu, \mu, \pi^*)}{2}$  plays the role of  $C$ , then we have:

$$\|Q^* - Q^\pi\|_{p,\nu} \leq \frac{2}{1-\gamma} \left( \frac{C_1(\nu, \mu, \pi) + C_1(\nu, \mu, \pi^*)}{2} \right)^{\frac{1}{p}} \|T^*Q - Q\|_{p,\mu}.$$

□

## 2 Proof of Th. 2

**Theorem 2.** Let  $\eta \in ]0, 1[$  and  $M$  be a finite deterministic MDP, with probability at least  $1 - \eta$ , we have:

$$\forall Q \in \mathfrak{Q}, \|T^*Q - Q\|_{p,\mu}^p \leq \|T^*Q - Q\|_{p,\mu_N}^p + \frac{2\|R\|_\infty}{1-\gamma} \sqrt{\varepsilon(N)},$$

where  $\varepsilon(N) = \frac{h(\ln(\frac{2N}{h})+1)+\ln(\frac{4}{\eta})}{N}$  and  $h = 2N_A(d+1)$ . Moreover, with probability at least  $1 - 2\eta$ :

$$\epsilon^{OBRM} = \|T^*Q_N - Q_N\|_{p,\mu}^p \leq \epsilon^B + \frac{2\|R\|_\infty}{1-\gamma} \left( \sqrt{\varepsilon(N)} + \sqrt{\frac{\ln(1/\eta)}{2N}} \right),$$

where  $\epsilon^B = \min_{Q \in \Omega} \|T^*Q - Q\|_{p,\mu}^p$  is the error due to the choice of features.

*Proof.* Here, we work with finite deterministic MDPs. This means that for each state-action couple  $(s, a)$ , there exists a unique next state  $s'$ . Let us note  $l \in S^{S \times A}$  the function that maps each state-action couple  $(s, a)$  to its next state  $s'$ . Then, we have:

$$\forall Q \in \mathbb{R}^{S \times A}, \forall (s, a) \in S \times A, T^*Q(s, a) = R(s, a) + \gamma \max_{b \in A} Q(l(s, a), b).$$

The result is based on Th 5.3 of [2], briefly recalled here. Let  $\mathfrak{F} \subset \mathbb{R}^X$  be a set of measurable bounded real-valued functions where  $X$  is a measurable set. In particular, we have  $\forall f \in \mathfrak{F}, \forall x \in X, a \leq f(x) \leq b$  where  $(a, b) \in \mathbb{R}^2$ . Let  $(x_i)_{i=1}^N$  be  $N$  independent and identically distributed random variables taking their values in  $X$  and such that  $x_i \sim F$  where  $F$  is a distribution over  $X$ . If  $\mathfrak{F}$  has a finite VC-dimension (Vapnik-Chervonenkis dimension)  $v(\mathfrak{F}) \leq h$  and  $\eta \in ]0, 1[$  then with probability at least  $1 - \eta$ , we have:

$$\forall f \in \mathfrak{F}, \int_{x \in X} f(x)F(dx) \leq \frac{1}{N} \sum_{i=1}^N f(x_i) + (b - a)\sqrt{\varepsilon(N)},$$

where  $\varepsilon(N) = \frac{h(\ln(\frac{2N}{h})+1)+\ln(\frac{4}{\eta})}{N}$ . And with probability at least  $1 - 2\eta$ :

$$\min_{f \in \mathfrak{F}} \left( \int_{x \in X} f(x)F(dx) \right) \leq \min_{f \in \mathfrak{F}} \left( \sum_{i=1}^N f(x_i) \right) + (b - a) \left( \sqrt{\varepsilon(N)} + \sqrt{\frac{\ln(1/\eta)}{2N}} \right).$$

Our result has exactly the same form where  $X = S \times A$ , the random variables  $(x_i)_{i=1}^N$  are replaced by  $(S_i, A_i)_{i=1}^N$ , the distribution  $F = \mu \in \Delta_{S \times A}$ , the space  $\mathfrak{F}$  is replaced by  $\tilde{\Omega} = \{|T^*Q - Q|^p, \text{ where } Q \in \Omega\}$ ,  $a = 0$  and  $b = \frac{2\|R\|_\infty}{1-\gamma}$ . The only thing left to prove our result is to show that the VC-dimension of  $\tilde{\Omega}$ ,  $v(\tilde{\Omega})$ , is such that  $v(\tilde{\Omega}) \leq 2N_A(d+1)$ .

First, let recall some definitions relative to the VC-dimension of a set of functions. Let  $f \in \mathbb{R}^X$  be a real-valued function where  $X$  is a set and  $(x_i, t_i)_{i=1}^N \in (X \times \mathbb{R})^N$  a sequence of couples of one element of  $X$  and one real value,  $m(f, x_i, t_i) = \mathbf{1}_{\{f(x_i) \geq t_i\}}$  is a boolean which says if  $f(x_i)$  is greater than  $t_i$  or not. Moreover,  $M(f, (x_i, t_i)_{i=1}^N) = (m(f, x_i, t_i))_{i=1}^N$  can be seen as a boolean vector of size  $N$  and we call it the message relative to both the function  $f$  and the sequence  $(x_i, t_i)_{i=1}^N$ . Let  $\mathfrak{F} \subset \mathbb{R}^X$ ,  $\mathfrak{N}(\mathfrak{F}, (x_i, t_i)_{i=1}^N)$  is the number of possible messages  $M(f, (x_i, t_i)_{i=1}^N)$  obtained when  $f \in \mathfrak{F}$ :

$$\mathfrak{N}(\mathfrak{F}, (x_i, t_i)_{i=1}^N) = \text{Card}(\{M(f, (x_i, t_i)_{i=1}^N), f \in \mathfrak{F}\}),$$

where Card denotes the cardinal of a given set. As  $M(f, (x_i, t_i)_{i=1}^N)$  is a boolean vector of size  $N$ , we have  $\mathfrak{N}(\mathfrak{F}, (x_i, t_i)_{i=1}^N) \leq 2^N$ . In addition, we define  $\mathfrak{N}(\mathfrak{F}, N) = \sup_{(x_i, t_i)_{i=1}^N \in (X \times \mathbb{R})^N} \mathfrak{N}(\mathfrak{F}, (x_i, t_i)_{i=1}^N)$  the maximum number of possible messages when  $f \in \mathfrak{F}$  that a given sequence  $(x_i, t_i)_{i=1}^N$  can produce. Finally, the VC-dimension of  $\mathfrak{F}$  is defined by:

$$v(\mathfrak{F}) = \inf_{N \in \mathbb{N}} \{ \mathfrak{N}(\mathfrak{F}, N) < 2^N \}.$$

In our proof, the followings properties relative to VC-dimensions of functions sets are needed.

**Property 1.** Let  $(\mathfrak{F}_k)_{k=1}^K$  be a sequence of set of functions where  $\mathfrak{F}_k \subset \mathbb{R}^X$  and  $v(\mathfrak{F}_k)$  is finite. Then, the set of functions  $\mathfrak{F} = \{\max_{k \in [1:K]} f_k, \text{ where } \forall k \in [1:K], f_k \in \mathfrak{F}_k\}$  has a finite VC-dimension lower that  $\sum_{k=1}^K v(\mathfrak{F}_k)$ .

Let  $(x_i, t_i)_{i=1}^N \in (X \times \mathbb{R})^N$ ,  $(f_k \in \mathfrak{F}_k)_{k=1}^K$  and  $f = \max_{k \in [1:K]} f_k$ , then:

$$M(f, (x_i, t_i)_{i=1}^N) = M(f_1, (x_i, t_i)_{i=1}^N) \vee M(f_2, (x_i, t_i)_{i=1}^N) \cdots \vee M(f_K, (x_i, t_i)_{i=1}^N),$$

where  $\vee$  is the boolean disjunction (the inclusive or). Thus, the number of possible messages  $\mathfrak{N}(\mathfrak{F}, (x_i, t_i)_{i=1}^N)$  is such that:

$$\mathfrak{N}(\mathfrak{F}, (x_i, t_i)_{i=1}^N) \leq \prod_{i=1}^K \mathfrak{N}(\mathfrak{F}_k, (x_i, t_i)_{i=1}^N).$$

This implies that:

$$\mathfrak{N}(\mathfrak{F}, N) \leq \prod_{i=1}^K \mathfrak{N}(\mathfrak{F}_k, N).$$

Now, if we choose  $N$  such that  $N > \max_{k \in [1:K]} v(\mathfrak{F}_k)$ , we have:

$$\mathfrak{N}(\mathfrak{F}, N) \leq \prod_{i=1}^K 2^{v(\mathfrak{F}_k)} = 2^{\sum_{k=1}^K v(\mathfrak{F}_k)}.$$

So,  $\mathfrak{F}$  has a finite VC-dimension lower than  $\sum_{k=1}^K v(\mathfrak{F}_k)$ . A second interesting result is a corollary of the previous proposition.

**Property 2.** Let  $\mathfrak{F} \subset \mathbb{R}^X$  be a set of functions with a finite VC-dimension, then the set of functions  $\mathfrak{F}_{|\cdot|} = \{|f|, f \in \mathfrak{F}\}$  has a VC-dimension lower than  $2v(\mathfrak{F})$ .

Indeed, to prove the result, we remark that  $|f| = \max(f, -f)$  and as the set  $\mathfrak{F}_- = \{-f, f \in \mathfrak{F}\}$  has the same VC-dimension than  $\mathfrak{F}$ , we apply the previous result to conclude. The last result needed is the following.

**Property 3.** Let  $\mathfrak{F} \subset \mathbb{R}_+^X$  be a set of functions with a finite VC-dimension, then the set  $\mathfrak{F}_p = \{f^p, f \in \mathfrak{F}\}$ , where  $p \geq 1$ , has the same VC-dimension.

To show this property, let  $f \in \mathfrak{F}$  and  $(x_i, t_i)_{i=1}^N \in (X \times \mathbb{R})^N$ , then:

$$M(f, (x_i, t_i)_{i=1}^N) = M(f^p, (x_i, \text{sgn}(t_i)|t_i|^p)_{i=1}^N),$$

where  $\text{sgn}$  is the sign function, thus  $\mathfrak{N}(\mathfrak{F}, (x_i, t_i)_{i=1}^N) = \mathfrak{N}(\mathfrak{F}_p, (x_i, \text{sgn}(t_i)|t_i|^p)_{i=1}^N)$ . As the function  $t \rightarrow \text{sgn}(t)|t|^p$  is a bijection, then:

$$\sup_{(x_i, t_i)_{i=1}^N \in (X \times \mathbb{R})^N} \mathfrak{N}(\mathfrak{F}_p, (x_i, t_i)_{i=1}^N) = \sup_{(x_i, t_i)_{i=1}^N \in (X \times \mathbb{R})^N} \mathfrak{N}(\mathfrak{F}_p, (x_i, \text{sgn}(t_i)|t_i|^p)_{i=1}^N).$$

So,  $\mathfrak{N}(\mathfrak{F}, N) = \mathfrak{N}(\mathfrak{F}_p, N)$  which implies that  $v(\mathfrak{F}) = v(\mathfrak{F}_p)$ .

Now, let show that the VC-dimension of  $\tilde{\mathfrak{Q}}$  is such that  $v(\tilde{\mathfrak{Q}}) \leq 2N_A(d+1)$ . To do so, we are going to proceed in several steps. The first step is to remark that:

$$T^*Q_\theta(s, a) - Q_\theta(s, a) = \max_{b \in A} \left( \sum_{k=1}^d \theta_k [\gamma \phi_k(l(s, a), b) - \phi_k(s, a)] + R(s, a) \right).$$

Thus, if we note  $\forall b \in A, \forall k \in [1:d], \psi_k^b(s, a) = \gamma \phi_k(l(s, a), b) - \phi_k(s, a)$ , we have:

$$T^*Q_\theta(s, a) - Q_\theta(s, a) = \max_{b \in A} \left[ \sum_{k=1}^d \theta_k \psi_k^b(s, a) + \theta_0 R(s, a) \right].$$

where  $\theta_0 = 1$ . Let  $b \in A$ , the set of functions  $\mathfrak{F}_b = \{f_\theta = \sum_{k=1}^d \theta_k \psi_k^b + \theta_0 R, \theta \in \mathbb{R}^d\}$  has a finite VC-dimension lower than  $d+1$  as the functions  $f_\theta \in \mathfrak{F}_b$  depends linearly on  $d+1$  parameters [2] where one of them ( $\theta_0$ ) is fixed. Now, we want to show that the set  $\tilde{\mathfrak{F}} = \{f_\theta = \max_{b \in A} [\sum_{k=1}^d \theta_k \psi_k^b + R], \theta \in \mathbb{R}^d\}$  has a finite VC-dimension lower than  $N_A(d+1)$ . To do so, we remark that  $\tilde{\mathfrak{F}} = \{f = \max_{b \in A} f_b, \text{ where } \forall b \in A, f_b \in \mathfrak{F}_b\}$ , thus by applying property. 1 to  $\tilde{\mathfrak{F}}$  we obtain that its VC-dimension is lower than  $N_A(d+1)$ . Now, let define the

set of functions  $\mathfrak{F}_{|\cdot|} = \{f_\theta = |\max_{b \in A} [\sum_{k=1}^d \theta_k \psi_k^b + R]|, \theta \in \mathbb{R}^d\} = \{|T^*Q_\theta - Q_\theta|, \theta \in \mathbb{R}^d\}$ . We remark that,  $\mathfrak{F}_{|\cdot|} = \{|f|, f \in \mathfrak{F}\}$ , thus, by using property 2, the VC-dimension of  $\mathfrak{F}_{|\cdot|}$  is lower than  $2N_A(d+1)$ . Finally, we define the set  $\mathfrak{F}_p = \{|T^*Q_\theta - Q_\theta|^p, \theta \in \mathbb{R}^d\}$ , where  $p \geq 1$ . We have  $\mathfrak{F}_p = \{f, f \in \mathfrak{F}_{|\cdot|}\}$ , thus, by applying property 3, we have that the VC-dimension of  $\mathfrak{F}_p$  is lower than  $2N_A(d+1)$ . As  $\tilde{\Omega} \subset \mathfrak{F}_p$ , we have  $v(\tilde{\Omega}) \leq 2N_A(d+1)$ .  $\square$

### 3 Proof of Th.4

**Theorem 3.** *There exists explicit polyhedral decompositions of  $J_{p,\mu_N}^p$  when  $p = 1$  and  $p = 2$ . For  $p = 1$ :*

$J_{1,\mu_N} = G_{1,\mu_N} - H_{1,\mu_N}$ ,  
where  $G_{1,\mu_N} = \frac{1}{N} \sum_{i=1}^N 2 \max(g_i, h_i)$  and  $H_{1,\mu_N} = \frac{1}{N} \sum_{i=1}^N (g_i + h_i)$ , with  $g_i = \langle \phi(S_i, A_i), \cdot \rangle + R(S_i, A_i)$  and  $h_i = \gamma \sum_{s' \in S} P(s'|S_i, A_i) \max_{a \in A} \langle \phi(s', a), \cdot \rangle$ . For  $p = 2$ :

$J_{2,\mu_N}^2 = G_{2,\mu_N} - H_{2,\mu_N}$ ,  
where  $G_{2,\mu_N} = \frac{1}{N} \sum_{i=1}^N [\bar{g}_i^2 + \bar{h}_i^2]$  and  $H_{2,\mu_N} = \frac{1}{N} \sum_{i=1}^N [\bar{g}_i + \bar{h}_i]^2$  with:

$$\begin{aligned} \bar{g}_i &= \max(g_i, h_i) + g_i - \left( \langle \phi(S_i, A_i) + \gamma \sum_{s' \in S} P(s'|S_i, A_i) \phi(s', a_1), \cdot \rangle - R(S_i, A_i) \right), \\ \bar{h}_i &= \max(g_i, h_i) + h_i - \left( \langle \phi(S_i, A_i) + \gamma \sum_{s' \in S} P(s'|S_i, A_i) \phi(s', a_1), \cdot \rangle - R(S_i, A_i) \right). \end{aligned}$$

*Proof.* When  $p = 1$ , it is sufficient to remark that for two functions  $g, h \in \mathbb{R}^E$ ,  $|g - h| = 2 \max(g, h) - (g + h)$ . Thus, let  $G_{1,\mu_N} = \frac{1}{N} \sum_{i=1}^N 2 \max(g_i, h_i)$  and  $H_{1,\mu_N} = \frac{1}{N} \sum_{i=1}^N (g_i + h_i)$  which are convex and continuous (as a finite maximum of convex and continuous functions and a positively weighted sum of convex and continuous functions are convex and continuous), then  $J_{1,\mu_N} = G_{1,\mu_N} - H_{1,\mu_N}$ . When  $p = 2$ , the decomposition is less straightforward. An important property that we use is the fact that  $f^2$  is a convex and continuous functions if  $f$  is a positive and continuous convex function. The first thing to do is to find a decomposition of  $f_i = \bar{g}_i - \bar{h}_i$  such that  $\bar{g}_i$  and  $\bar{h}_i$  are positive and continuous convex functions. To do so, it is sufficient to remark that:

$$\begin{aligned} \bar{g}_i &= \max(g_i, h_i) + g_i - \left( \langle \phi(S_i, A_i) + \gamma \sum_{s' \in S} P(s'|S_i, A_i) \phi(s', a_1), \cdot \rangle - R(S_i, A_i) \right), \\ \bar{h}_i &= \max(g_i, h_i) + h_i - \left( \langle \phi(S_i, A_i) + \gamma \sum_{s' \in S} P(s'|S_i, A_i) \phi(s', a_1), \cdot \rangle - R(S_i, A_i) \right). \end{aligned}$$

are positive and continuous convex functions. Thus:

$$J_{2,\mu_N}^2 = \frac{1}{N} \sum_{i=1}^N [\bar{g}_i - \bar{h}_i]^2 = \frac{1}{N} \sum_{i=1}^N [\bar{g}_i^2 + \bar{h}_i^2] - \frac{1}{N} \sum_{i=1}^N [\bar{g}_i + \bar{h}_i]^2.$$

As  $\bar{g}_i$  and  $\bar{h}_i$  are convex, continuous and positive then  $\bar{g}_i^2 + \bar{h}_i^2$  and  $[\bar{g}_i + \bar{h}_i]^2$  are convex and continuous. So, if we note  $G_{2,\mu_N} = \frac{1}{N} \sum_{i=1}^N [\bar{g}_i^2 + \bar{h}_i^2]$  and  $H_{2,\mu_N} = \frac{1}{N} \sum_{i=1}^N [\bar{g}_i + \bar{h}_i]^2$  which are convex and continuous, we have  $J_{2,\mu_N}^2 = G_{2,\mu_N} - H_{2,\mu_N}$ . We also remark that  $G_{2,\mu_N}$ ,  $H_{2,\mu_N}$ ,  $G_{1,\mu_N}$  and  $H_{1,\mu_N}$  are polyhedral and  $J_{p,\mu_N}^p$  is under bounded by 0, thus DCA has better convergence properties than in the classical case.  $\square$

### References

- [1] R. Munos. Performance bounds in  $L_p$ -norm for approximate value iteration. *SIAM journal on control and optimization*, 2007.
- [2] V. Vapnik. *Statistical learning theory*. Wiley, 1998.
